# Supplementary material for: First-principles study of thermal transport properties in ferroelectric HfO2 and related fluorite-structure ferroelectrics
Source: Royal Society of Chemistry journal article supplement (doi:10.1039/d3cp01491f), 2023-01-01
Supplement: d3cp01491f1.pdf [file d3cp01491f1.pdf]

## Supplementary information: First-principles study of thermal transport properties in ferroelectric HfO<sub>2</sub> and related fluorite-structure ferroelectrics

Shenglong Zhang<sup>a,b</sup>, Shilei Yi<sup>a,b</sup>, Jia-Yue Yang<sup>a,b</sup>, Jian Liu<sup>a,b,\*</sup>, Linhua Liu<sup>a,b,\*</sup>

<sup>a</sup> School of Energy and Power Engineering, Shandong University, Jinan, Shandong, 250061, China

<sup>b</sup> Institute of Frontier and Interdisciplinary Science, Shandong University, Qingdao, Shandong, 266237, China

Table. S1. The elastic constants (in units of GPa) for fluorite-structure ferroelectrics.

|                   | $C_{11}$ | $C_{12}$ | $C_{13}$ | $C_{21}$ | $C_{22}$ | $C_{23}$ | $C_{31}$ | $C_{32}$ | $C_{33}$ | $C_{44}$ | $C_{55}$ | $C_{66}$ |
|-------------------|----------|----------|----------|----------|----------|----------|----------|----------|----------|----------|----------|----------|
| ZrO <sub>2</sub>  | 37.2     | 14.8     | 11.4     | 14.8     | 37.9     | 12.7     | 11.4     | 12.7     | 36.6     | 8.4      | 8.7      | 12.3     |
| ZrS <sub>2</sub>  | 19.7     | 7.0      | 6.8      | 7.0      | 13.4     | 5.5      | 6.8      | 5.5      | 14.1     | 2.5      | 4.0      | 6.5      |
| ZrSe <sub>2</sub> | 16.3     | 5.8      | 5.5      | 5.8      | 11.3     | 4.7      | 5.5      | 4.7      | 11.8     | 1.8      | 2.6      | 5.4      |
| HfO <sub>2</sub>  | 39.3     | 15.3     | 11.8     | 15.3     | 40.9     | 13.2     | 11.8     | 13.2     | 40.0     | 9.3      | 9.5      | 13.6     |
| HfS <sub>2</sub>  | 20.9     | 7.2      | 6.5      | 7.2      | 15.1     | 5.7      | 6.5      | 5.7      | 16.5     | 2.9      | 3.8      | 6.8      |
| HfSe <sub>2</sub> | 17.2     | 6.0      | 5.4      | 6.0      | 13.1     | 4.9      | 5.4      | 4.9      | 14.2     | 2.2      | 2.8      | 5.6      |
| CaCl <sub>2</sub> | 6.6      | 2.9      | 2.0      | 2.9      | 5.7      | 1.9      | 2.0      | 1.9      | 6.2      | 1.4      | 1.5      | 2.1      |
| CaBr <sub>2</sub> | 5.3      | 2.3      | 1.4      | 2.3      | 4.6      | 1.4      | 1.4      | 1.4      | 5.2      | 1.0      | 1.1      | 1.7      |
| CaI <sub>2</sub>  | 4.0      | 1.7      | 0.9      | 1.7      | 3.7      | 1.0      | 0.9      | 1.0      | 4.4      | 0.7      | 0.8      | 1.4      |
| SrCl <sub>2</sub> | 5.4      | 2.6      | 2.1      | 2.6      | 4.5      | 1.7      | 2.1      | 1.7      | 4.1      | 1.2      | 1.3      | 1.8      |
| SrBr <sub>2</sub> | 4.6      | 2.2      | 1.7      | 2.2      | 3.5      | 1.3      | 1.7      | 1.3      | 3.6      | 0.9      | 1.1      | 1.5      |
| SrI <sub>2</sub>  | 3.8      | 1.7      | 1.3      | 1.7      | 2.8      | 0.9      | 1.3      | 0.9      | 3.2      | 0.7      | 0.8      | 1.2      |

Table. S2. The elastic stability criteria for fluorite-structure ferroelectrics.

| Criteria<br>Structure | (i)  | (ii)   | (iii)   | (iv) | (v) | (vi) |
|-----------------------|------|--------|---------|------|-----|------|
| ZrO <sub>2</sub>      | 37.2 | 1190.8 | 36944.8 | 8.4  | 8.7 | 12.3 |
| ZrS <sub>2</sub>      | 19.7 | 215.0  | 2339.3  | 2.5  | 4.0 | 6.5  |
| ZrSe <sub>2</sub>     | 16.3 | 150.6  | 1374.5  | 1.8  | 2.6 | 5.4  |
| HfO <sub>2</sub>      | 39.3 | 1373.3 | 47154.9 | 9.3  | 9.5 | 13.6 |
| HfS <sub>2</sub>      | 20.9 | 263.8  | 3568.4  | 2.9  | 3.8 | 6.8  |
| HfSe <sub>2</sub>     | 17.2 | 189.3  | 2210.9  | 2.2  | 2.8 | 5.6  |
| CaCl <sub>2</sub>     | 6.6  | 29.2   | 156.5   | 1.4  | 1.5 | 2.1  |
| CaBr <sub>2</sub>     | 5.3  | 19.1   | 88.9    | 1.0  | 1.1 | 1.7  |
| CaI <sub>2</sub>      | 4.0  | 11.9   | 48.5    | 0.7  | 0.8 | 1.4  |
| SrCl <sub>2</sub>     | 5.4  | 17.5   | 55.0    | 1.2  | 1.3 | 1.8  |
| SrBr <sub>2</sub>     | 4.6  | 11.3   | 32.4    | 0.9  | 1.1 | 1.5  |
| SrI <sub>2</sub>      | 3.8  | 7.8    | 21.0    | 0.7  | 0.8 | 1.2  |

Criteria (i):  $C_{11} > 0$ ; (ii):  $C_{11}C_{22} - C_{12}^2 > 0$ ;

\* Corresponding authors.

E-mail address: Jian.Y.Liu@sdu.edu.cn (Jian Liu); liulinhua@sdu.edu.cn (Linhua Liu)

---


$$(iii): C_{11}C_{22}C_{33} + 2C_{12}C_{13}C_{23} - C_{11}C_{23}^2 - C_{22}C_{13}^2 - C_{33}C_{12}^2 > 0;$$

$$(iv): C_{44} > 0; (v): C_{55} > 0; (vi): C_{66} > 0.$$


---

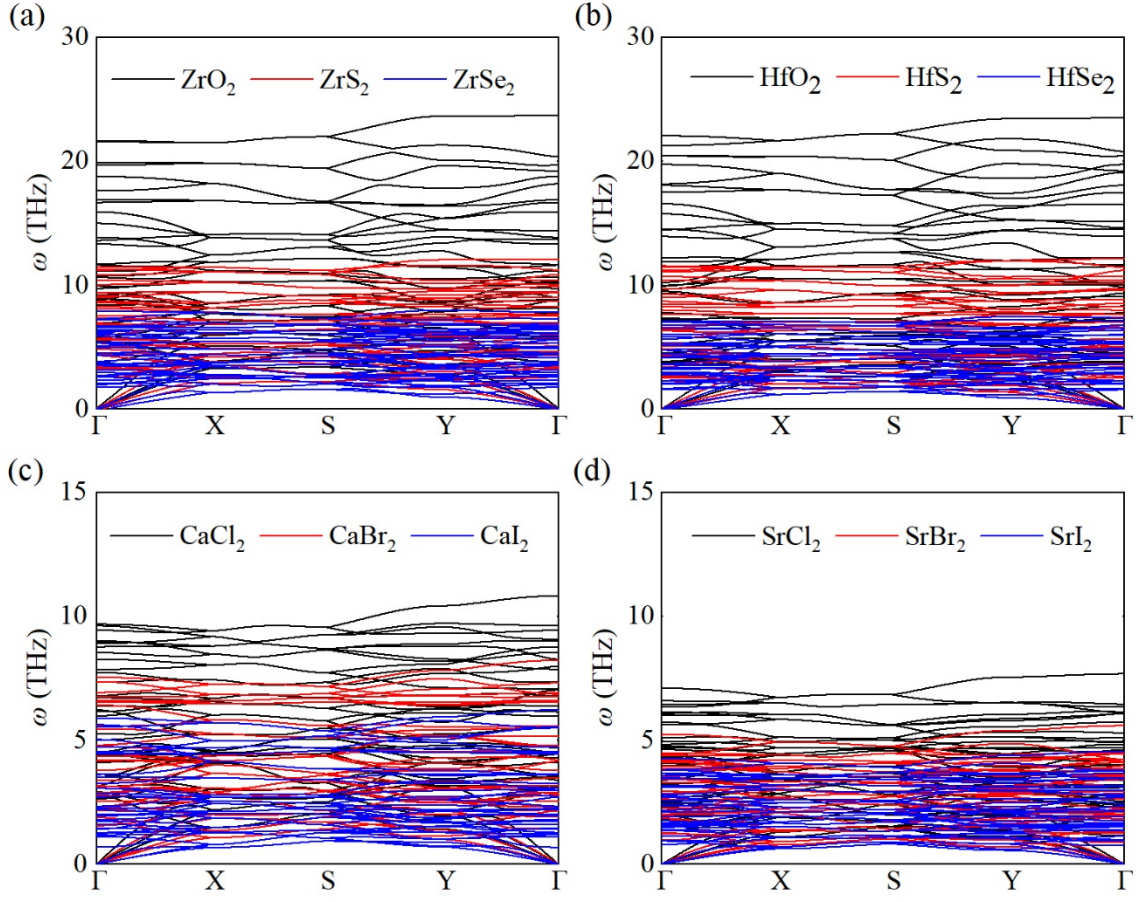

Fig. S1. The phonon dispersion curves for (a,b) group IV-VI and (c,d) group II-VII fluorite-structure ferroelectrics.

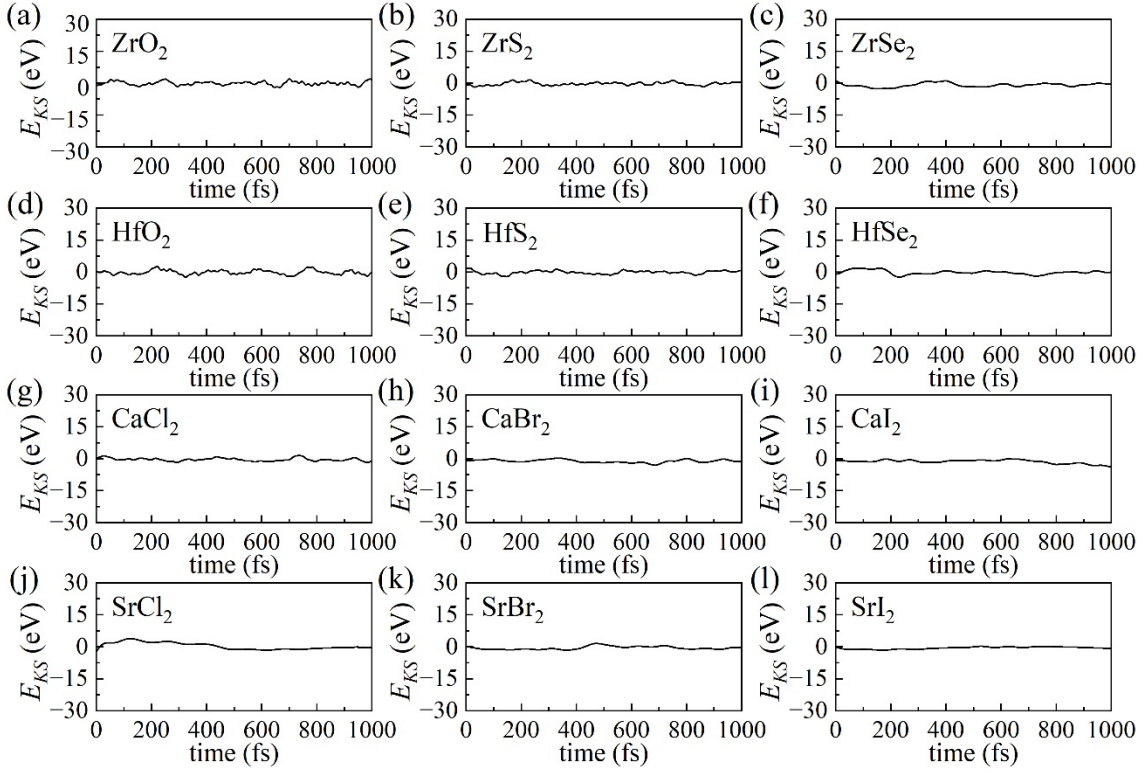

Fig. S2. *Ab-initio* molecular dynamics (AIMD) simulations at 300 K for fluorite-structure ferroelectrics.

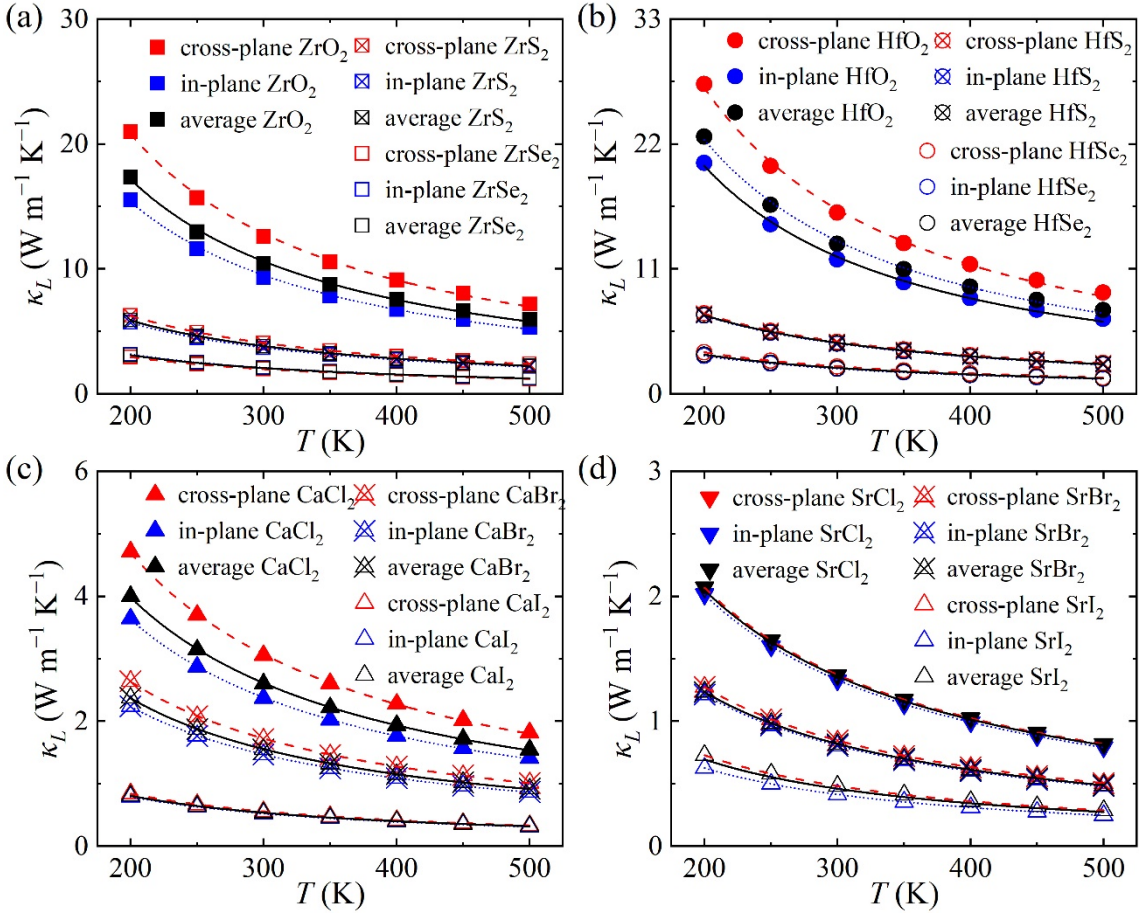

Fig. S3. The temperature-dependent in-plane (perpendicular to the direction of spontaneous polarization  $P_S$ ), cross-plane (parallel to the direction of  $P_S$ ) and average thermal conductivities  $\kappa_L$  for (a,b) group IV-VI and (c,d) group II-VII fluorite-

structure ferroelectrics.

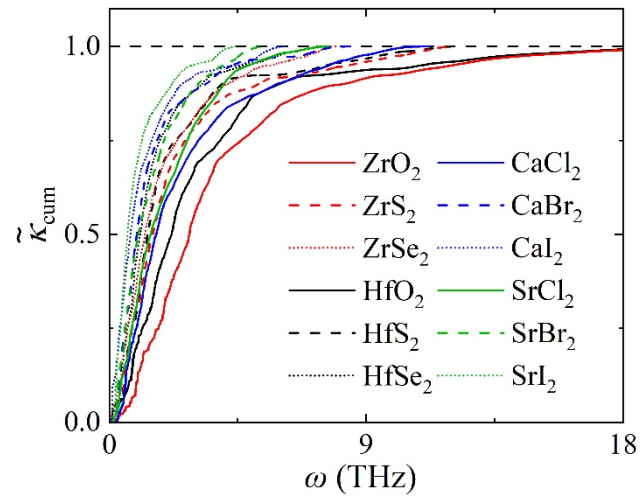

Fig. S4. Normalized cumulative thermal conductivity  $\tilde{\kappa}_{cum}$  for fluorite-structure ferroelectrics.
